# Supplementary material for: DNA/BSA binding, DNA cleavage and electrochemical properties of new multidentate copper(ii) complexes
Source: Royal Society of Chemistry journal article supplement (doi:10.1039/c4ra03554b), 2014-01-01
Supplement: c4ra03554b1.pdf [file c4ra03554b1.pdf]

## Supporting Information

### **DNA/BSA binding, DNA cleavage and electrochemical properties of new multidentate copper(II) complexes**

**Elumalai Sundaravadivel<sup>a</sup>, Sairaj Vedavalli, Muthusamy Kandaswamy <sup>a\*</sup>, Babu Varghese<sup>b</sup>  
and Perumal Madankumar<sup>c</sup>**

**E-mail: [mkands@yahoo.com](mailto:mkands@yahoo.com)**

*<sup>a</sup>Department of Inorganic Chemistry, University of Madras, Guindy Campus, Chennai 600 025,  
India*

*<sup>b</sup>Sophisticated Analytical Instruments Facility, Indian Institute of Technology, Chennai 600 036,  
India*

*<sup>c</sup>Department of Biochemistry, University of Madras, Guindy Campus, Chennai 600 025, India*

---

\*corresponding author

E-mail: [mkands@yahoo.com](mailto:mkands@yahoo.com)

Tel: +91-44-22351269 Fax: +91-44-22300488

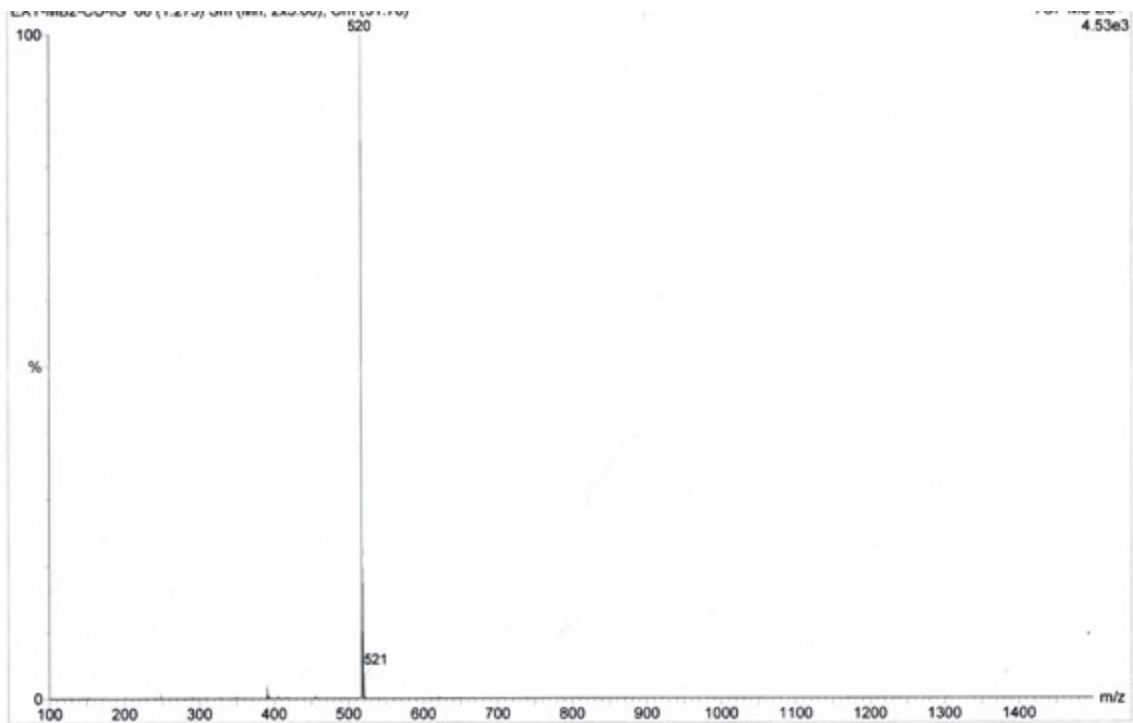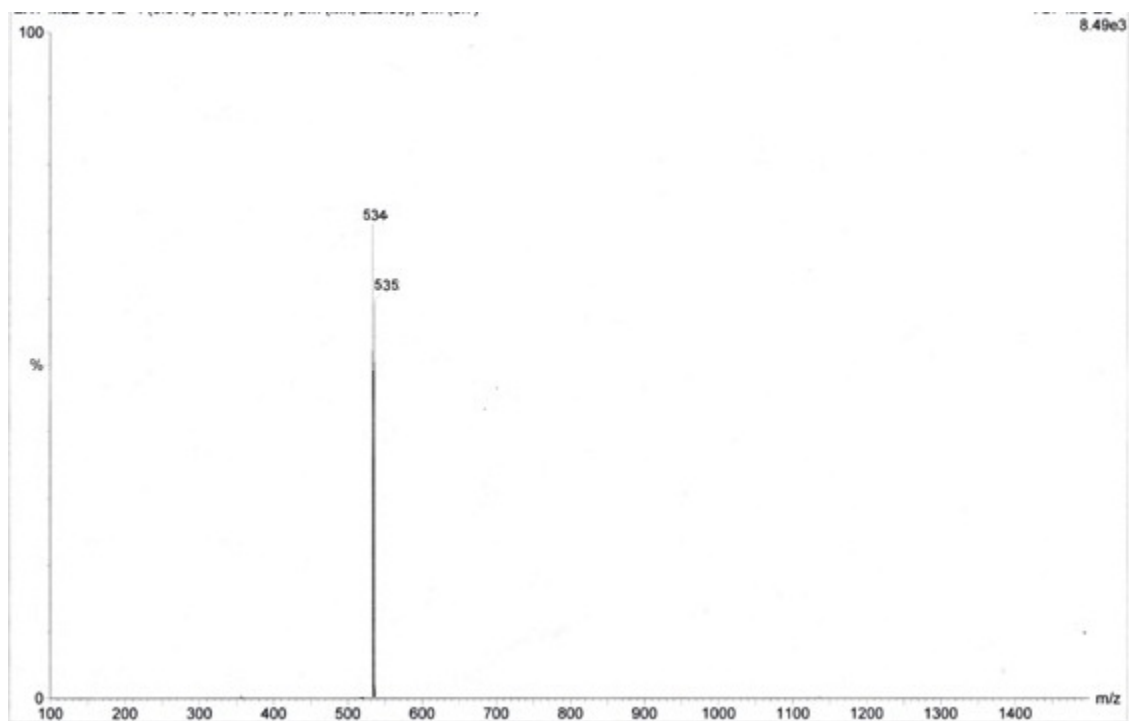

Fig. S1. ESI-MS spectrum of mono nuclear complexes (1) and (2)

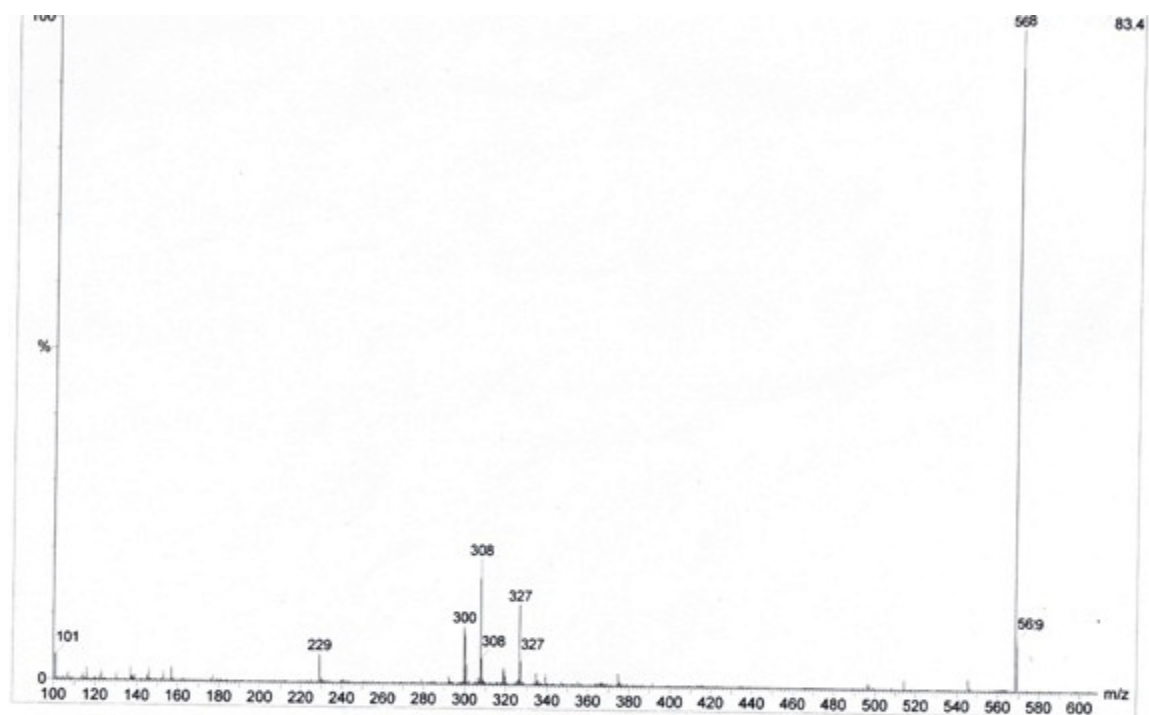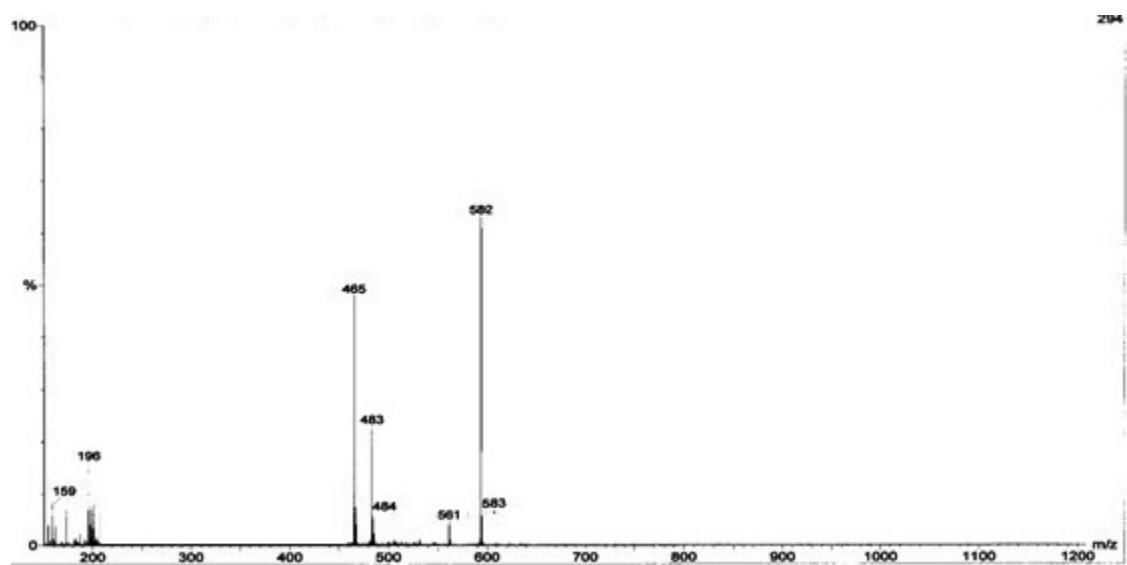

Fig. S1. ESI-MS spectrum of mono nuclear complexes (3) and (5)

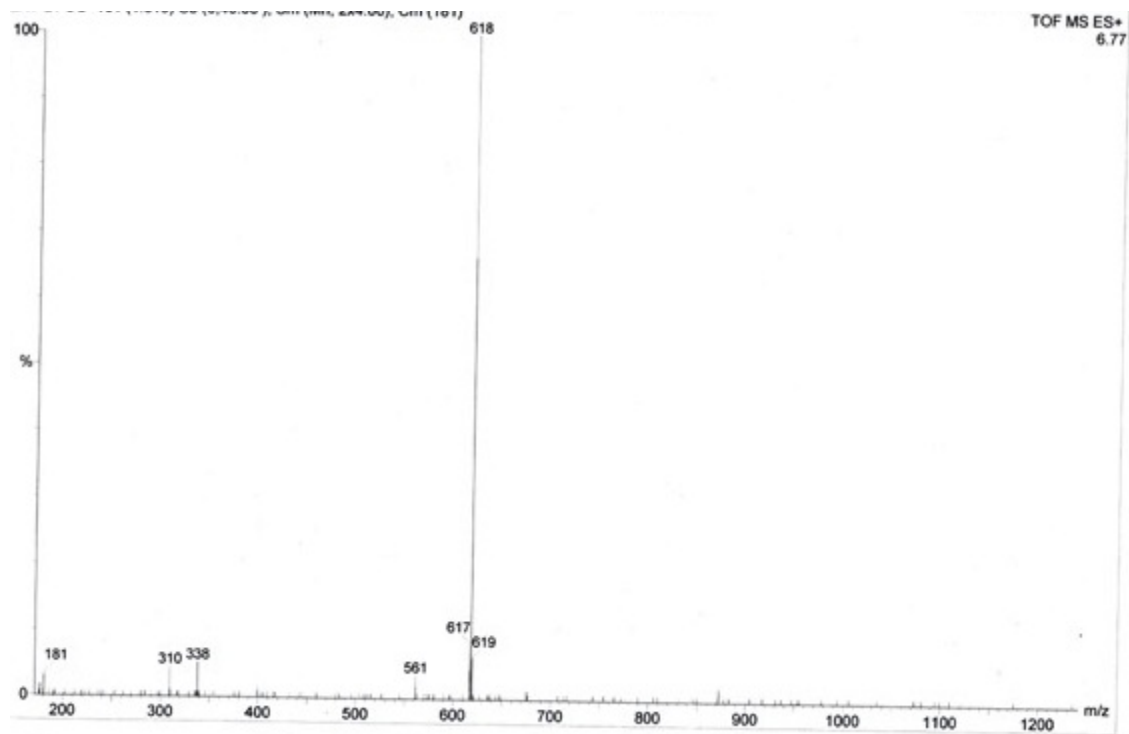

Fig. S1. ESI-MS spectrum of mono nuclear complex (5)

Table S1. Hydrogen bonds for complex 1 [A and deg.].

---

| D-H...A               | d(D-H)    | d(H...A) | d(D...A)  | <(DHA) |
|-----------------------|-----------|----------|-----------|--------|
| N(4)-H(4A)...O(2)     | 0.849(18) | 1.95(3)  | 2.620(4)  | 135(3) |
| C(4)-H(4)...O(6)#1    | 0.93      | 2.61     | 3.261(12) | 127.7  |
| C(7)-H(7)...O(4)#2    | 0.93      | 2.29     | 3.218(8)  | 173.1  |
| C(18)-H(18A)...O(6)#3 | 0.97      | 2.75     | 3.622(14) | 149.7  |
| C(14)-H(14)...O(5)#3  | 0.93      | 2.49     | 3.216(9)  | 135.1  |
| C(17)-H(17A)...O(4)   | 0.97      | 2.57     | 3.470(9)  | 154.2  |

---

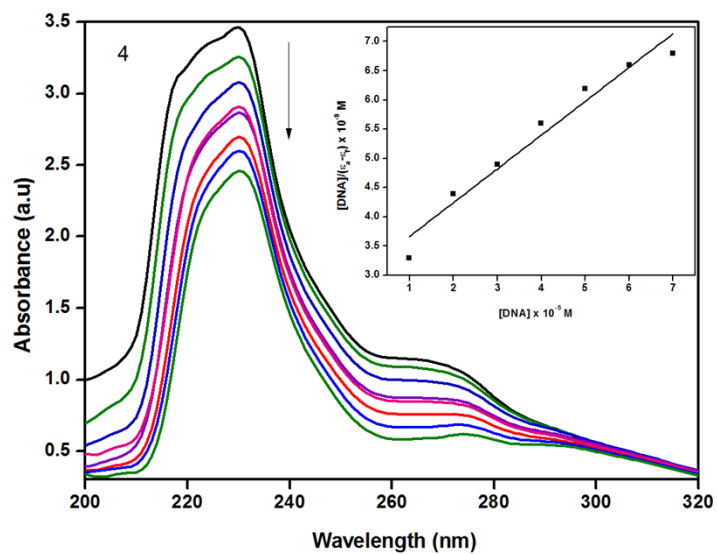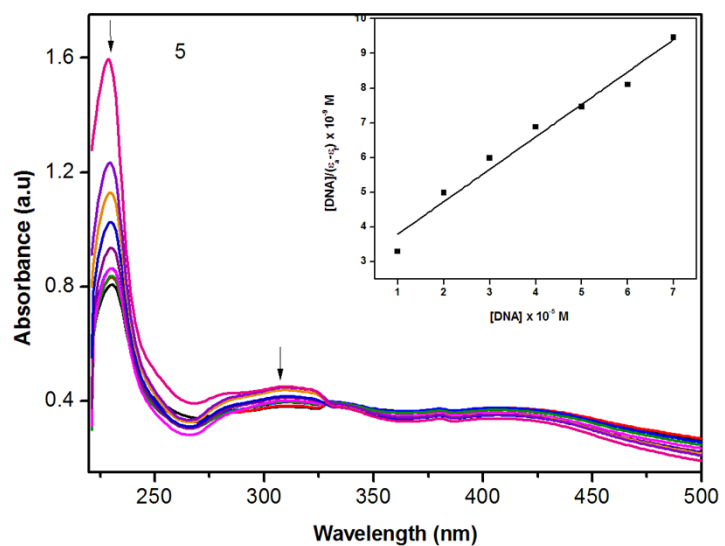

**Fig. S2** Absorption spectra of the complex (4) and (5) in the absence and presence of increasing amounts of CT-DNA (0 – 250  $\mu\text{M}$ ) at 25  $^{\circ}\text{C}$  in 50 mM Tris-HCl (pH = 7.2).

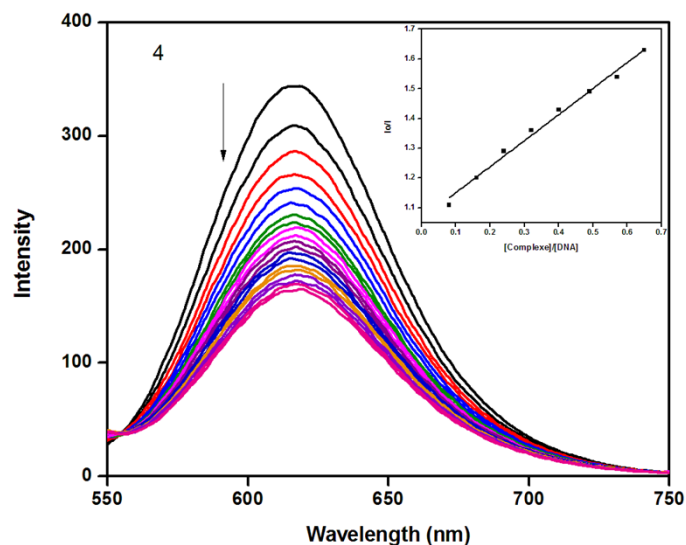

**Fig. S3** Emission spectra ( $\lambda_{\text{ex}} = 520 \text{ nm}$ ) of EB-DNA in Tris-HCl buffer in the absence and presence of the Complex (**4**).  $[\text{EtBr}] = 4 \mu\text{M}$ ,  $[\text{DNA}] = 40 \mu\text{M}$ . Arrow shows the decrease of intensity of EtBr-DNA upon increasing the concentration of complex.

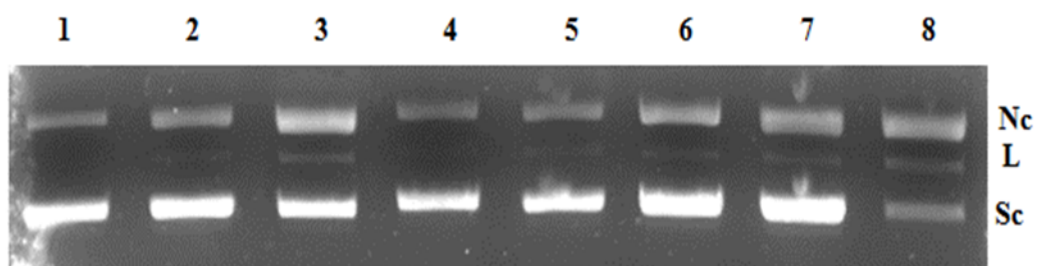

**Fig. S4** Gel electrophoresis diagrams shows the cleavage of supercoiled pBR322 DNA ( $150 \mu\text{g mL}^{-1}$ ) by copper(II) complexes (**3**) ( $0.03 \text{ mM}$ ) in presence of mercaptoethanol (ME) ( $1 \text{ mM}$ ) as reducing agent in ( $50 \text{ mM}$ ) Tris-HCl buffer at pH 7.2 and  $37 \text{ }^\circ\text{C}$  with an incubation time of 3 h and different quenchers. Lane 1, DNA control; Lane 2, DNA + ME +  $\text{Cu}(\text{ClO}_4)_2 \cdot 6\text{H}_2\text{O}$ ; Lane 3, DNA + ME + (**3**); Lane 4, DNA + ME + (**3**) +  $\text{NaN}_3$  ( $2 \mu\text{L}$ ); Lane 5, DNA + ME + (**3**) + L-histidine ( $1 \text{ mM}$ ); Lane 6, DNA + ME + (**3**) + DMSO ( $1 \text{ mM}$ ); Lane 7, DNA + ME + (**3**) + KI; Lane 8, DNA + ME + (**3**) + SOD ( $5 \text{ units}$ );

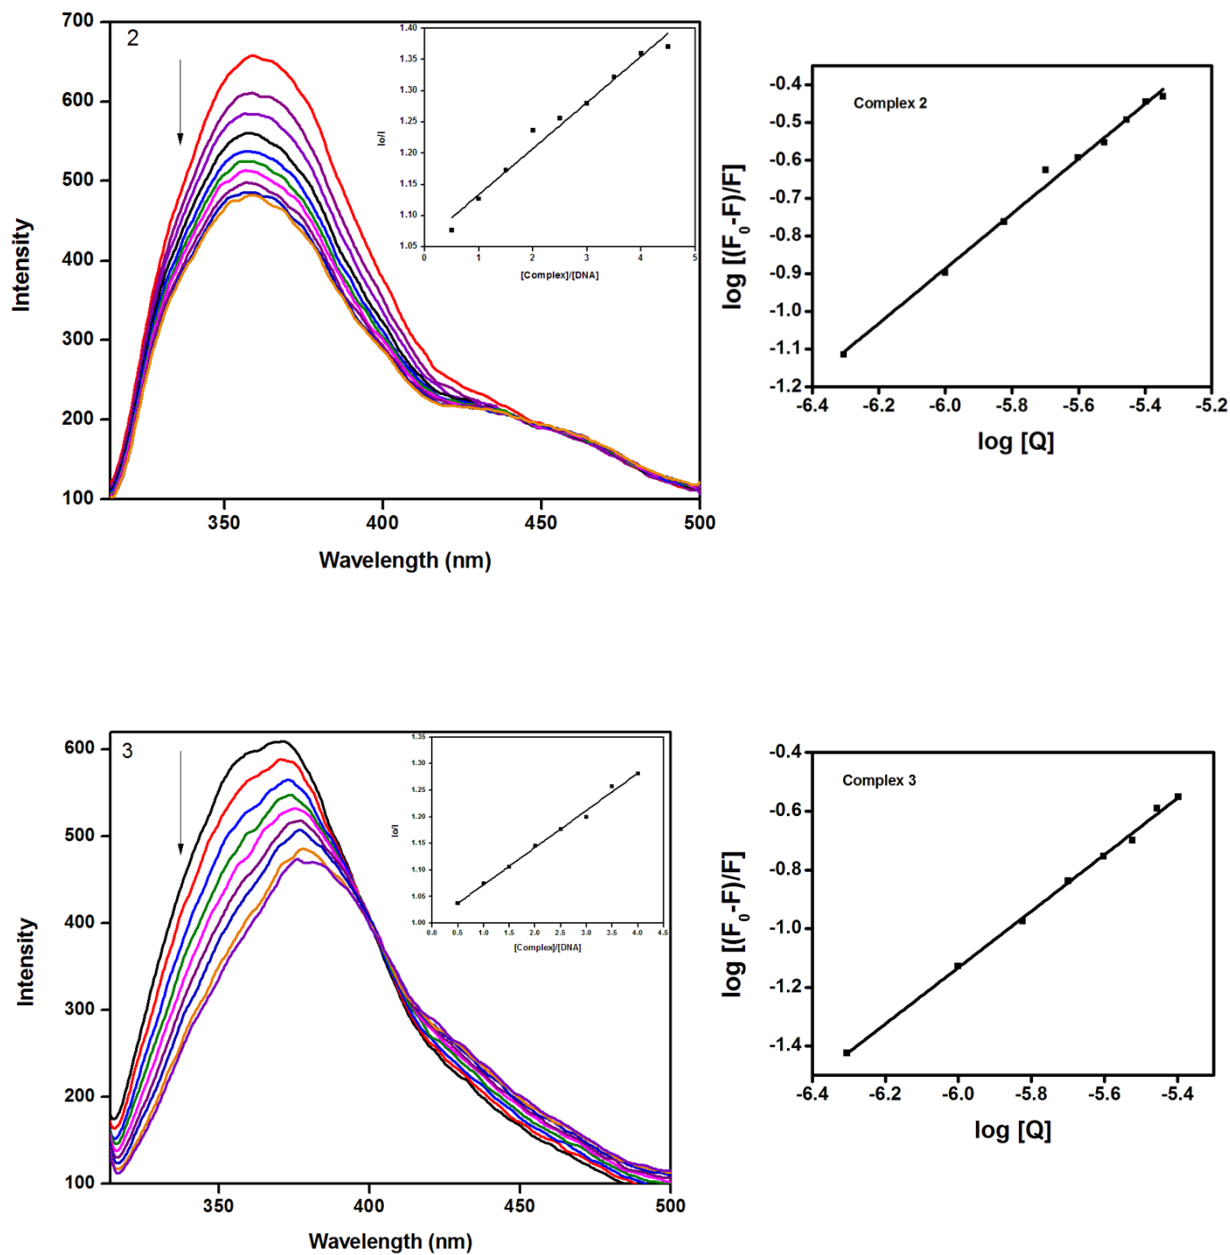

**Fig. S5** Changes in the fluorescence spectra and double-logarithm plot of BSA upon increasing complex (2) and complex (3) concentration at 300 K. The concentration of BSA is 1  $\mu\text{M}$  and complex concentration range from 0.0 to 10  $\mu\text{M}$ , pH = 7.2 and  $\lambda_{\text{ex}} = 280 \text{ nm}$ .

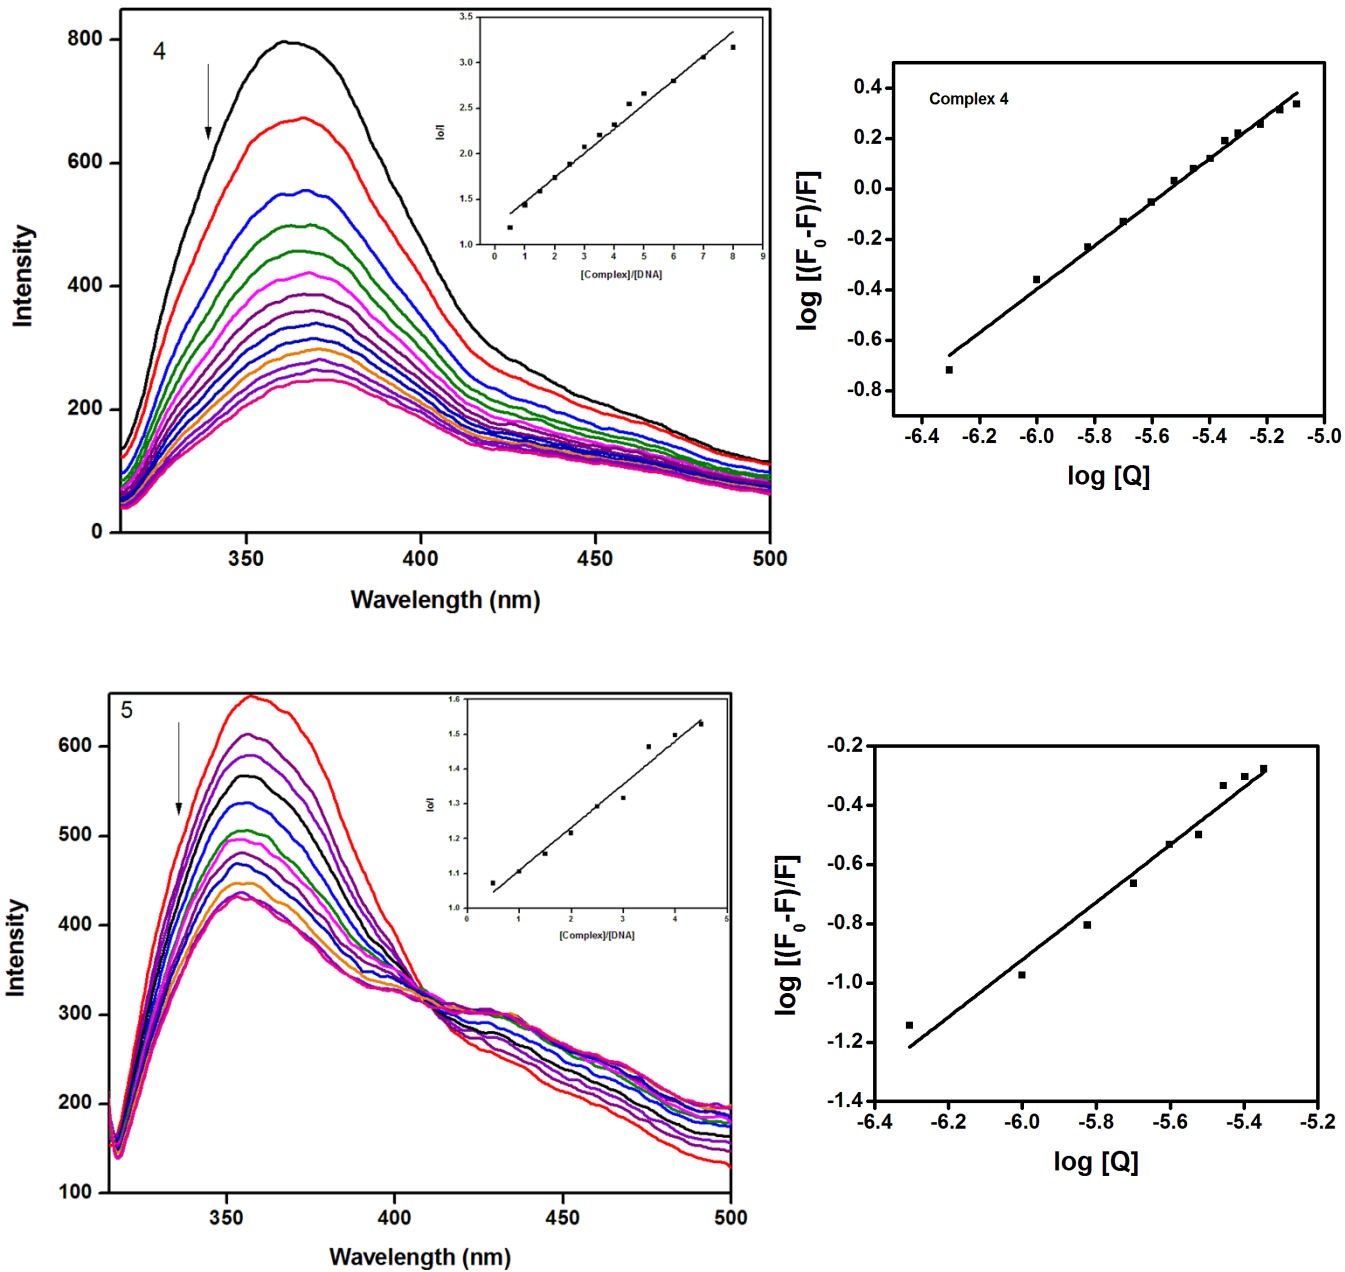

**Fig. S5** Changes in the fluorescence spectra and double-logarithm plot of BSA upon increasing complex (4) and complex (5) concentration at 300 K. The concentration of BSA is 1  $\mu\text{M}$  and complex concentration range from 0.0 to 10  $\mu\text{M}$ , pH = 7.2 and  $\lambda_{\text{ex}} = 280 \text{ nm}$ .



Compound - 5

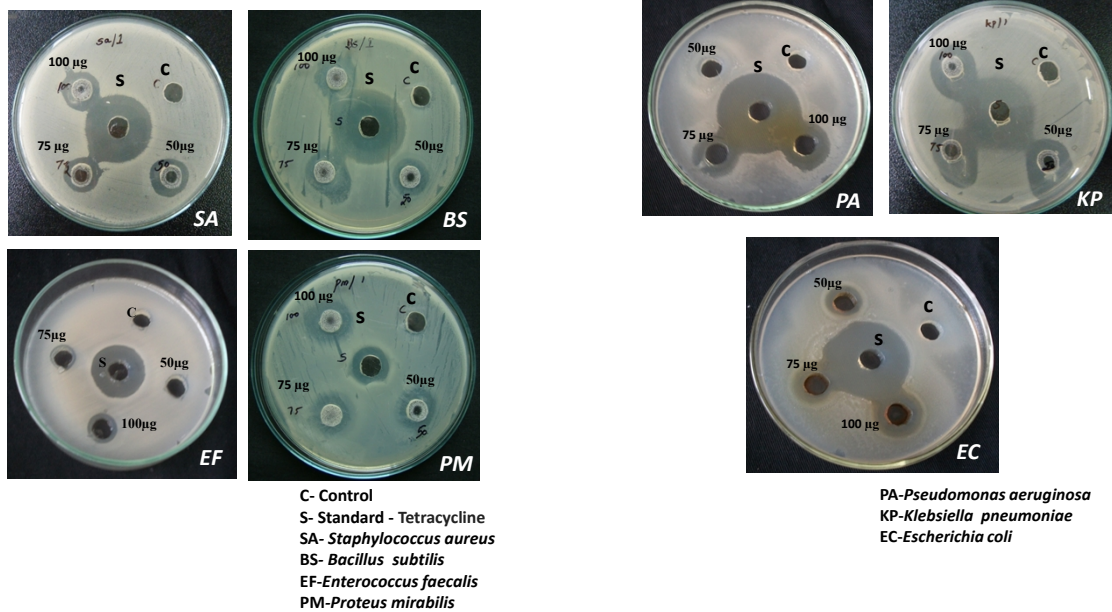

**Fig. S6** Antimicrobial activity of complex (5) against *S. aureus*, *B. subtilis*, *E. faecalis*, *P. mirabilis*, *P. aeruginosa*, *K. pneumoniae* and *E. coli*.

**Table s2** Antimicrobial activity of complex (5)

|            | <b>Organisms</b>              | <b>Concentration</b>          |              |               |
|------------|-------------------------------|-------------------------------|--------------|---------------|
|            |                               | <b>50 µg</b>                  | <b>75 µg</b> | <b>100 µg</b> |
|            |                               | <b>Zone of inhibition, mm</b> |              |               |
| <b>(5)</b> | <i>Staphylococcus aureus</i>  | 12                            | 15           | 17            |
|            | <i>Bacillus subtilis</i>      | 11                            | 12           | 16            |
|            | <i>Enterococcus faecalis</i>  | 11                            | 14           | 15            |
|            | <i>Proteus mirabilis</i>      | 11                            | 12           | 15            |
|            | <i>Pseudomonas aeruginosa</i> | 14                            | 18           | 22            |
|            | <i>Klebsiella pneumonia</i>   | 12                            | 16           | 16            |
|            | <i>Escherichia coli</i>       | 11                            | 12           | 17            |
